# Supplementary material for: Parallel Evolution of Metazoan Mitochondrial Proteins
Source: PubMed Central journal article supplement (PMC5520408; doi:10.1093/gbe/evx025), 2017-02-14
Supplement: suppl_figure_5.pdf [file suppl_figure_5.pdf]

% of all unrelated  
branch pairs of the  
tree

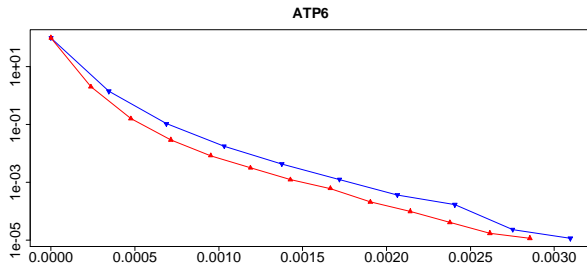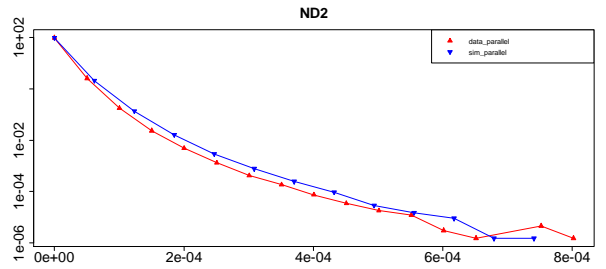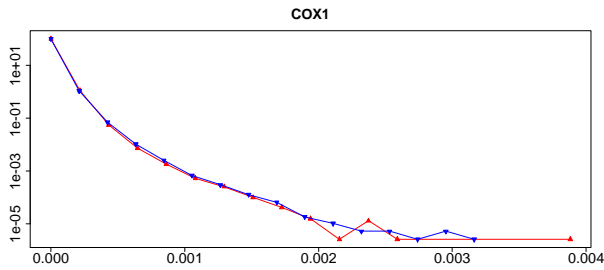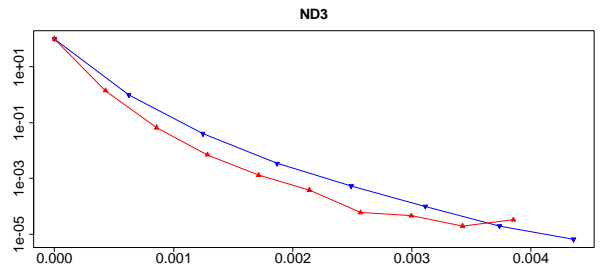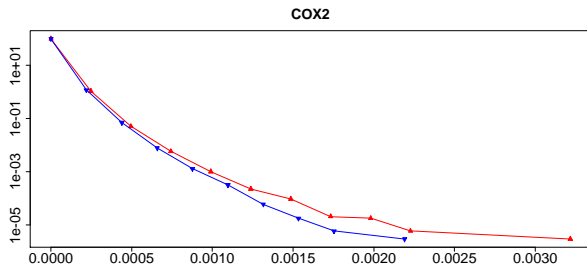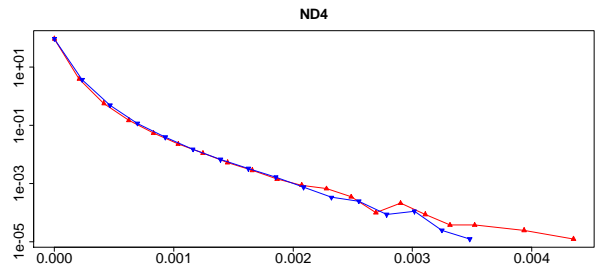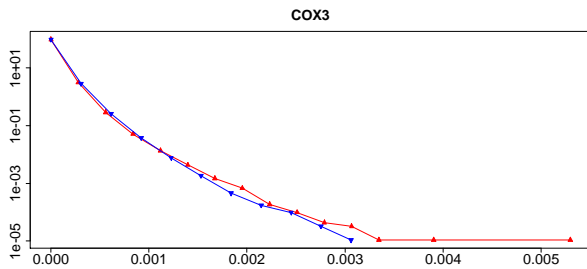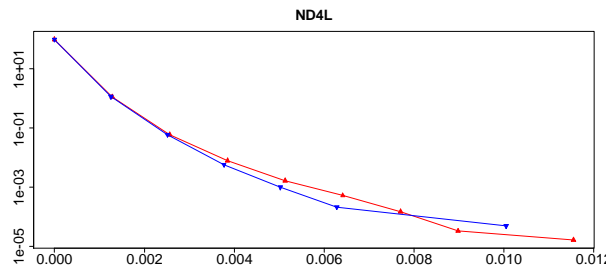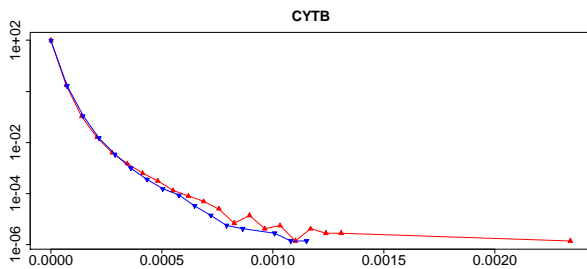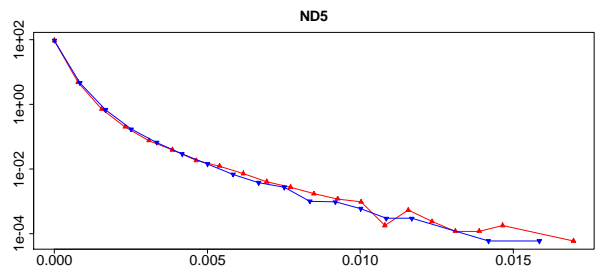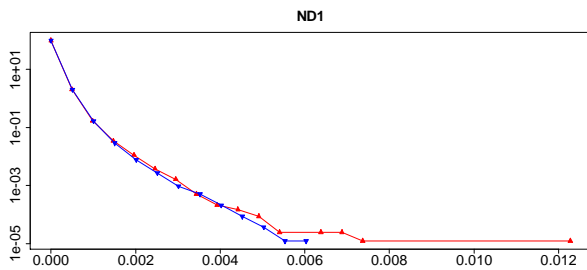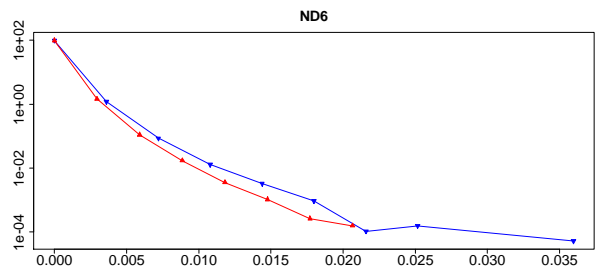

% of all substitution pairs  
from one branch pair
